# Supplementary material for: Prehypertensive Blood Pressures and Regional Cerebral Blood Flow Independently Relate to Cognitive Performance in Midlife
Source: PubMed Central journal article supplement — J Am Heart Assoc. 2017 Mar 17;6(3):e004856. doi: 10.1161/JAHA.116.004856 (PMC5524017; doi:10.1161/jaha.116.004856), 2017-03-17
Supplement: JAH3-6-e004856-s001.pdf [file JAH3-6-e004856-s001.pdf]

# **SUPPLEMENTAL MATERIAL**

**Table S1.** Neuropsychological measures listed within the derived factor used in analyses.

Memory Factor

| Test                                       | Description                                                                                                                                                                | Reference      |
|--------------------------------------------|----------------------------------------------------------------------------------------------------------------------------------------------------------------------------|----------------|
| Newspaper Story:<br>Immediate              | Modification of the Logical Memory subtest from the Wechsler Memory Scale. Participants hear brief story and then recall it.                                               | <sup>1</sup>   |
| Newspaper Story:<br>Delayed                | Recall after 30 minute delay                                                                                                                                               | <sup>1</sup>   |
| Digit Symbol<br>Substitution recall        | Participants recall number-symbol pairs that were used during completion of WAIS-R Digit Symbol Substitution Test                                                          | <sup>2,3</sup> |
| Rey Auditory Verbal<br>Learning: Immediate | Participants hear a list of 15 unrelated words and then recall them. After 5 study/test trials, they hear a second, list, recall that list, and then recall the first list | <sup>4</sup>   |
| Rey Auditory Verbal<br>Learning: Delayed   | Recall of first list after a 30 minute delay                                                                                                                               | <sup>4</sup>   |

### Working Memory Factor

| Test                                        | Description                                                                                                                                               | Reference    |
|---------------------------------------------|-----------------------------------------------------------------------------------------------------------------------------------------------------------|--------------|
| Rey Complex Figure:<br>Immediate            | Participants copy a complex geometric design; they then reproduce it from memory immediately after copying it                                             | <sup>4</sup> |
| Rey Complex Figure:<br>Delayed              | Reproduce design after ~ 30 minute delay                                                                                                                  | <sup>4</sup> |
| Trails Making: Trails B<br>error (inverted) | Number of errors made in completing Part B of the Trail Making Test                                                                                       | <sup>5</sup> |
| Letter-Number<br>Sequencing                 | Participants hear a string of numbers and letters and then repeat them, with numbers first in ascending order, followed by letters in alphabetical order. | <sup>6</sup> |
| 4 Word Short Term<br>Memory                 | Participants hear 4 simple words, then hear a number from which they count backwards for 5, 15, or 30 second, and then recall the words.                  | <sup>7</sup> |

### Executive Function Factor

| Test | Description | Reference |
|------|-------------|-----------|
|------|-------------|-----------|

|                                |                                                                                                                                                                                                                                      |   |
|--------------------------------|--------------------------------------------------------------------------------------------------------------------------------------------------------------------------------------------------------------------------------------|---|
| Stroop Color-Word Interference | Participants see names of colors (e.g., 'red') printed in a different color ink and have to inhibit the highly learned reading response to name the color of the ink as quickly as possible                                          | 8 |
| Verbal Fluency                 | Participants are asked to name all the words they can think of in 60 seconds that begin with a particular letter of the alphabet. Three trials are administered (letters F, A, S). Also are asked to name animals in 60 second trial |   |

### Mental Inefficiency Factor

| Test                    | Description                                                                                                                                             | Reference |
|-------------------------|---------------------------------------------------------------------------------------------------------------------------------------------------------|-----------|
| Digit Vigilance times   | Participants rapidly scan rows of numbers and cross out all targets (number '6') quickly and accurately. Total time to complete both pages is recorded. | 9         |
| Trails Making: Trails A | Participants are presented with a page                                                                                                                  | 5         |

|                       |                                                                                                                                                                  |               |
|-----------------------|------------------------------------------------------------------------------------------------------------------------------------------------------------------|---------------|
| time                  | of lettered dots and connect them in alphabetical order as quickly as possible.                                                                                  |               |
| Digit Symbol time     | This WAIS-R subtest requires participants to review a page of numbers (1-9) and substitute symbols below them, according to a fixed code as rapidly as possible. | <sup>2</sup>  |
| Grooved Pegboard time | Rapidly place notched pegs into a board of 25 keyholes. Two trials (dominant and non-dominant hand) are administered.                                            | <sup>10</sup> |

Attention Factor

| Test                      | Description                                          | Reference    |
|---------------------------|------------------------------------------------------|--------------|
| Digit Vigilance omissions | Number of targets missed during Digit Vigilance Test | <sup>9</sup> |

## Supplemental References:

1. Waldstein SR, Ryan CM, Polefrone JM, Manuck SB. Neuropsychological performance of young men who vary in familial risk for hypertension. *Psychosomatic Medicine*. 1994;56:449-456.
2. Wechsler D. *WAIS-R Manual*. New York: The Psychological Corporation; 1981.
3. Kaplan E, Fein D, Morris R, Delis D. *WAIS-R as a Neuropsychological Instrument*. San Antonio, TX: Psychological Corporation; 1991.
4. Lezak MD. Neuropsychological assessment (3rd ed.). (1995) *Neuropsychological assessment (3rd ed ) xviii, 1026 pp New York, NY, US: Oxford University Press; US*. 1995.
5. Reitan R. Validity of the Trail Making Test as an indicator of organic brain damage. *Perceptual and Motor Skills*. 1958;8:271-276.
6. Wechsler D. Cognitive, conative, and non-intellective intelligence (1950). *Notterman, Joseph M [Ed] (1997) The evolution of psychology: Fifty years of the American Psychologist (pp 22-32) xxv, 783 pp Washington, DC, US: American Psychological Association; US*. 1997:22-32.
7. Morrow LA, Ryan CM. Normative data for a working memory test: The Four Word Short-Term Memory Test. *The Clinical Neuropsychologist*. 2002;16:373-380.
8. Golden CJ. *Stroop color and word test*. Wood Dale, IL: Stoelting Co.; 1978.
9. Lewis RF. *Digit Vigilance Test*. . Odessa, FL: Psychological Assessment Resources; 1995.
10. Lewis R, Kupke T. Intermanual differences on skilled and unskilled motor tasks in nonlateralized brain dysfunction. *Clinical Neuropsychologist*. 1992;6:374-382.
